# Supplementary material for: The novel testicular enrichment protein Cfap58 is required for Notch-associated ciliogenesis
Source: Oxford University Press journal article supplement (doi:10.1042/bsr20192666), 2020-01-01
Supplement: bsr-2019-2666_supp.pdf [file bsr-2019-2666_supp.pdf]

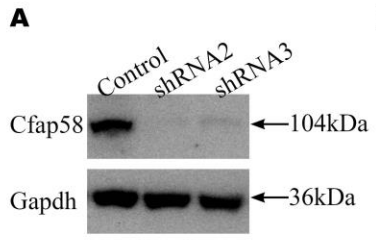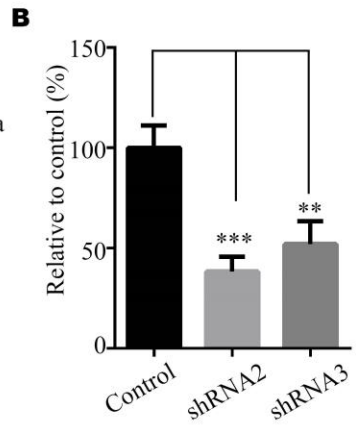

**Supplementary Figure 1:RNAi knockdown efficiency in the mouse astrocytes.** (A) Western blot analysis exhibits validation of shRNA vectors targeted to mouse endogenous Cfap58 in mouse astrocytes. The Gapdh level was as an internal control, (n≥4). (B) Statistical results show the silence efficiency of Cfap58 shRNA vectors. Data are shown as the means  $\pm$  SEM. NS, P > 0.05; \*, P  $\leq$  0.05; \*\*, P  $\leq$  0.01.

**A**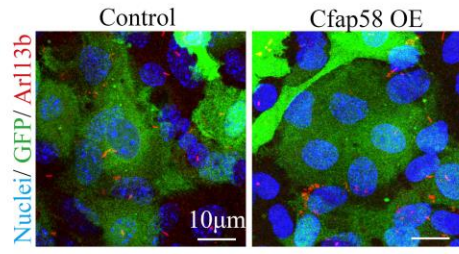**B**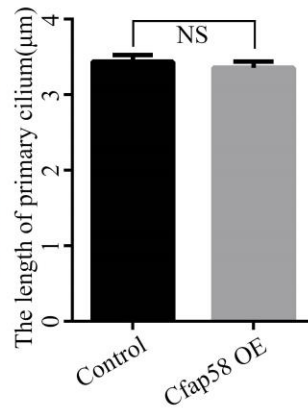

**Supplementary Figure 2: Overexpression of Cfap58 in astrocytes does not enhance the length of primary cilia.** (A) Representative images of the primary cilia in control and Cfap58 overexpression group. Cells are stained with Arl13b antibody (red), GFP antibody (green) or Hoechst34580 indicated as primary cilia marker, infected cells marker and nuclei, respectively. N=3 replicates. Scale bar=10 $\mu$ m. (B) Statistical results show the length of the primary cilia in control and Cfap58 overexpression group. Data are shown as the means  $\pm$  SEM. NS, P > 0.05.

**A**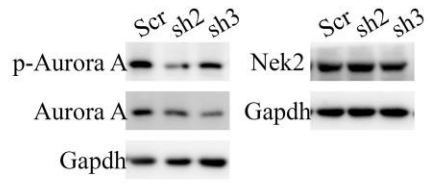**B**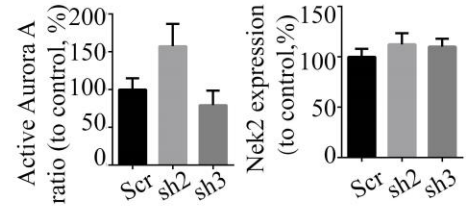

**Supplementary Figure 3: Cfap58 regulates ciliogenesis independent of Aurora A activation and Nek2.**

(A) Representative western blotting images showing the expression of phosphorylated Aurora A, total Aurora A (right panel) and Nek2 (left panel) in control and Cfap58 KO groups. The Gapdh level was as an internal control. (B) Statistical results show the expression levels of active Aurora A (right panel) and Nek2 (left panel), (n=3). Data are shown as the means  $\pm$  SEM.
